# Supplementary material for: Prognostic Factors of Survival with Aflibercept and FOLFIRI (fluorouracil, leucovorin, irinotecan) as Second-line Therapy for Patients with Metastatic Colorectal Cancer
Source: PubMed Central journal article supplement (PMC7739009; doi:10.7150/jca.49176), 2021-01-01

Table S1. Best overall response to treatment

| Overall response      | Patient number | % (95% CI)       |
|-----------------------|----------------|------------------|
| CR                    | 4              | 7.7 (0.5-14.9)   |
| PR                    | 21             | 40.4 (27.1-53.7) |
| SD                    | 19             | 36.5 (23.5-49.6) |
| PD                    | 8              | 15.4 (5.6-25.2)  |
| Overall response rate | 25             | 48.1 (34.5-61.7) |
| Disease control rate  | 44             | 84.6 (74.8-94.4) |

CI, confidence interval; CR, complete response; PR, partial response; SD, stable disease; PD, progressive disease.

Figure S1. Kaplan–Meier plot of PFS according to (A) baseline CEA level and (B) RAS/RAF mutation status.

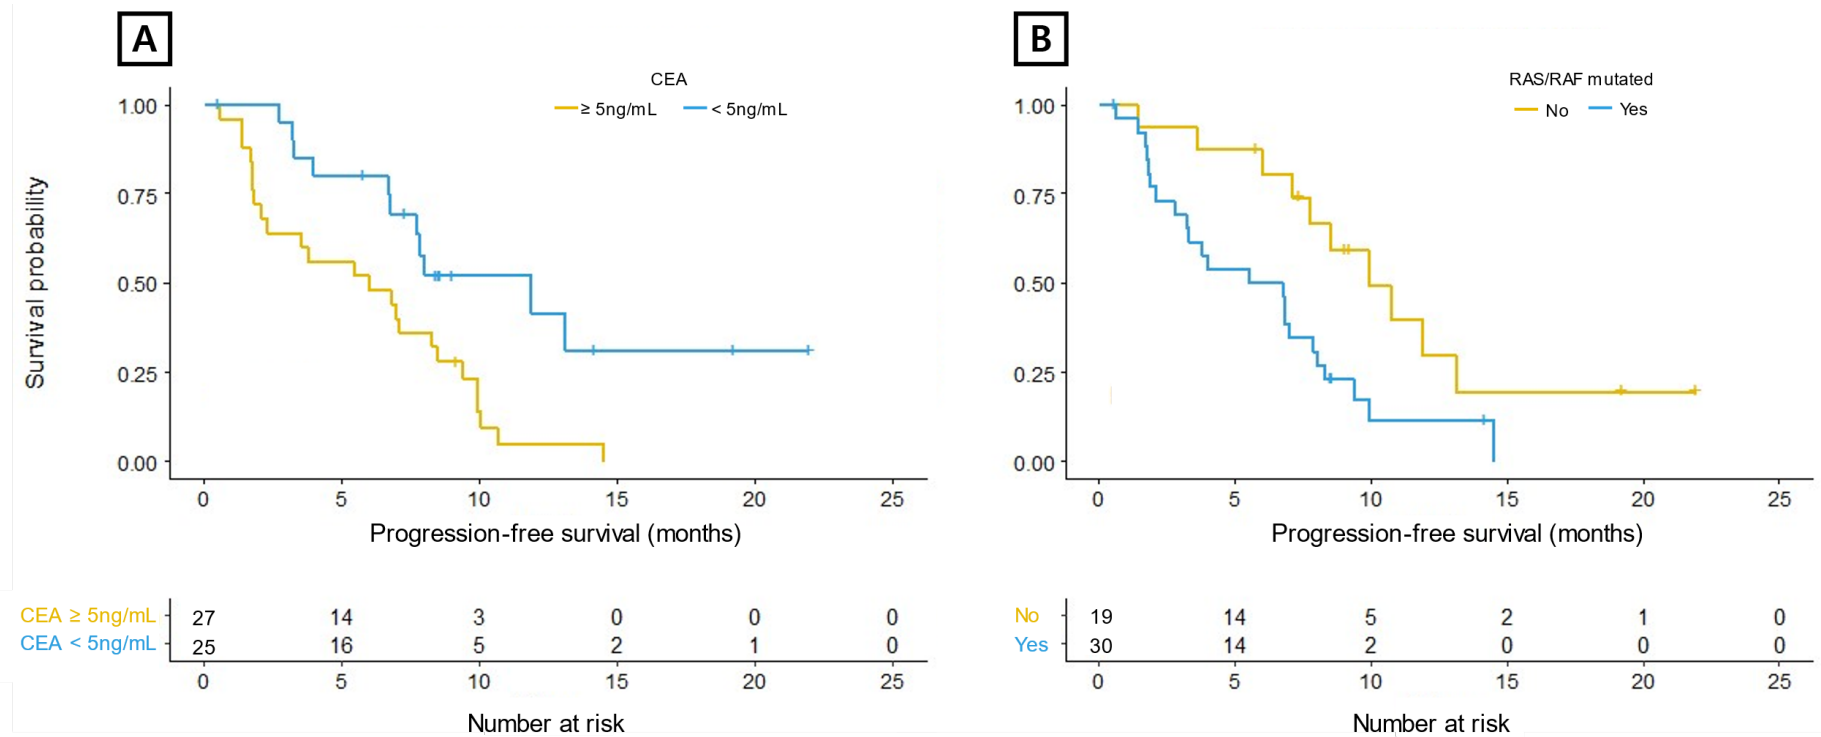

Figure S2. Kaplan–Meier plot of PFS according to (A) primary tumor location and (B) response to first-line treatment.

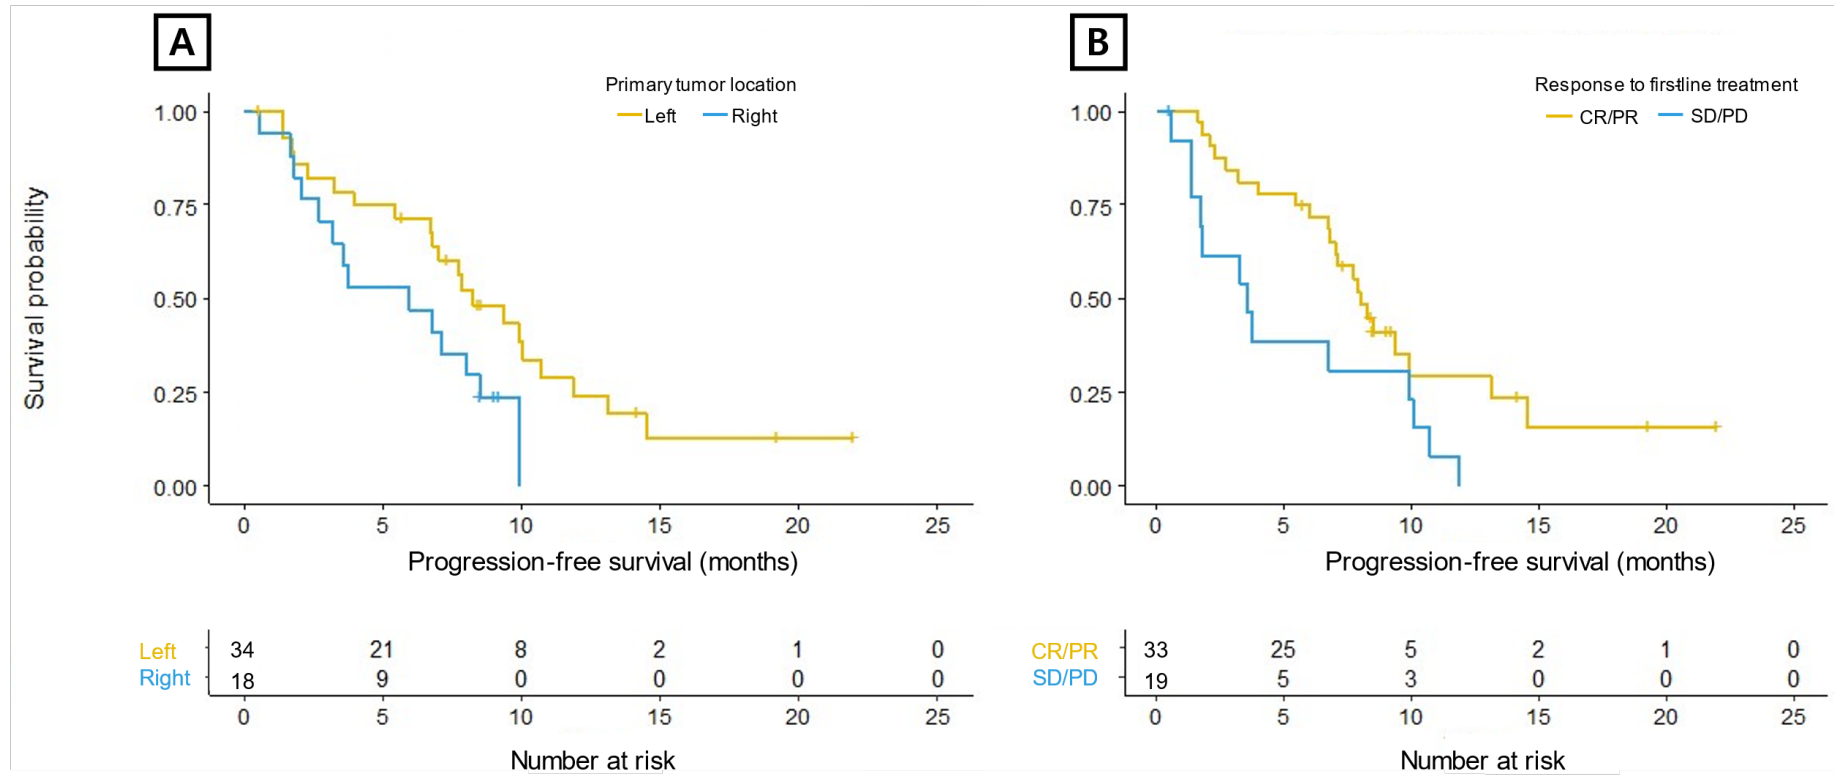

Figure S3. Kaplan–Meier plot of PFS according to (A) previous surgery and (B) number of organ metastasis.

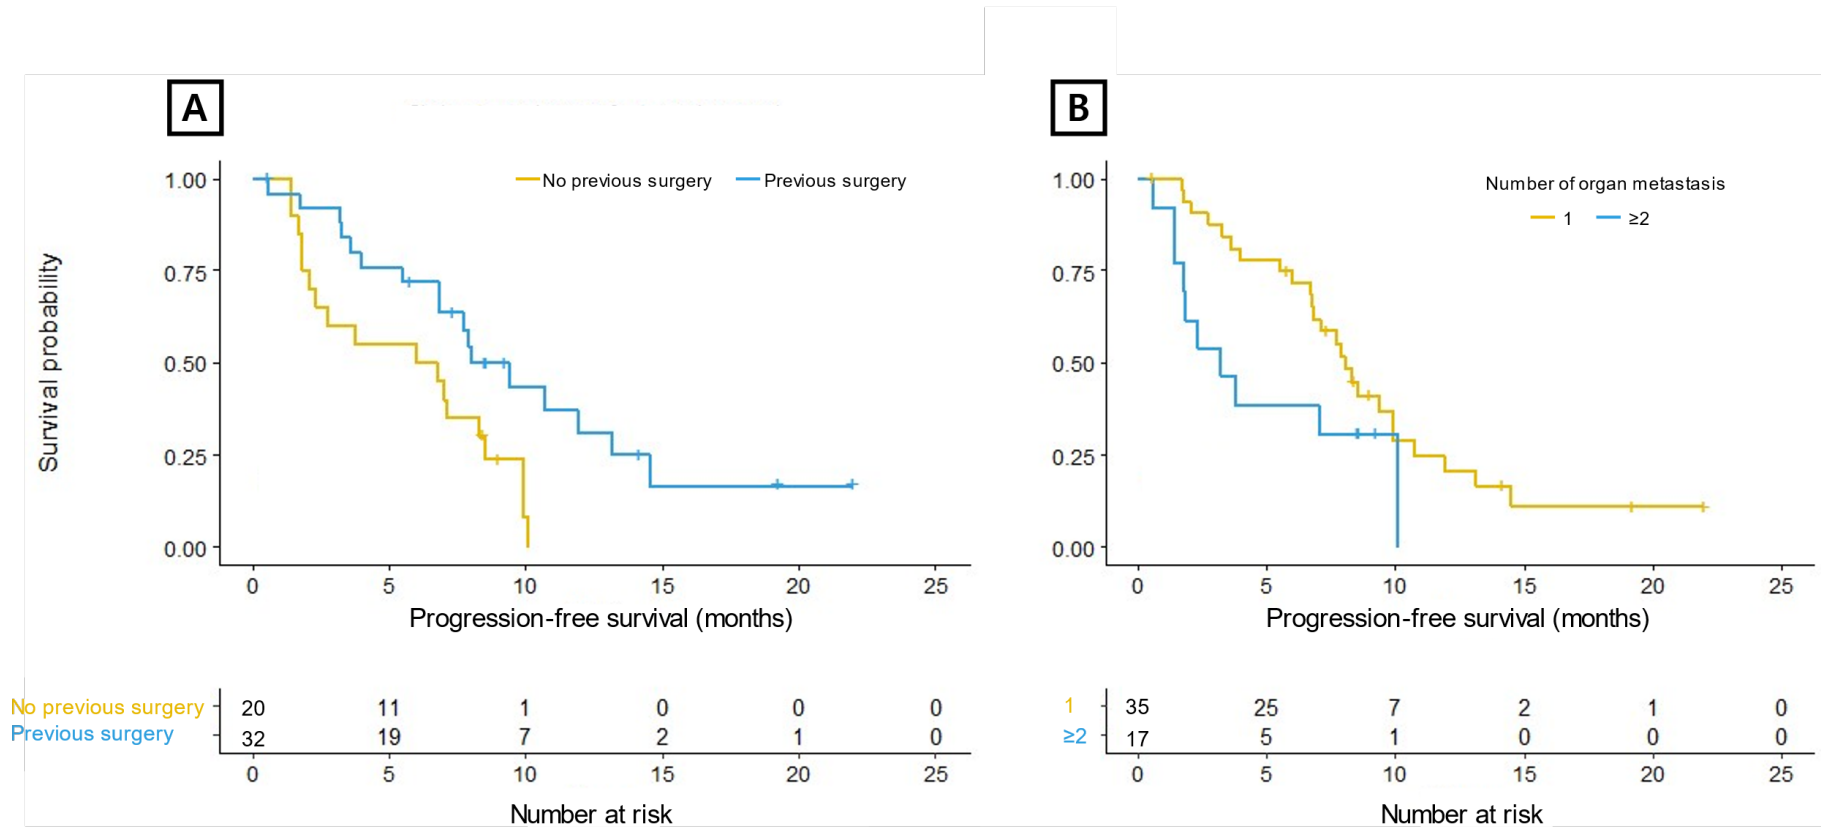

Figure S4. Multivariate survival model after variable selection

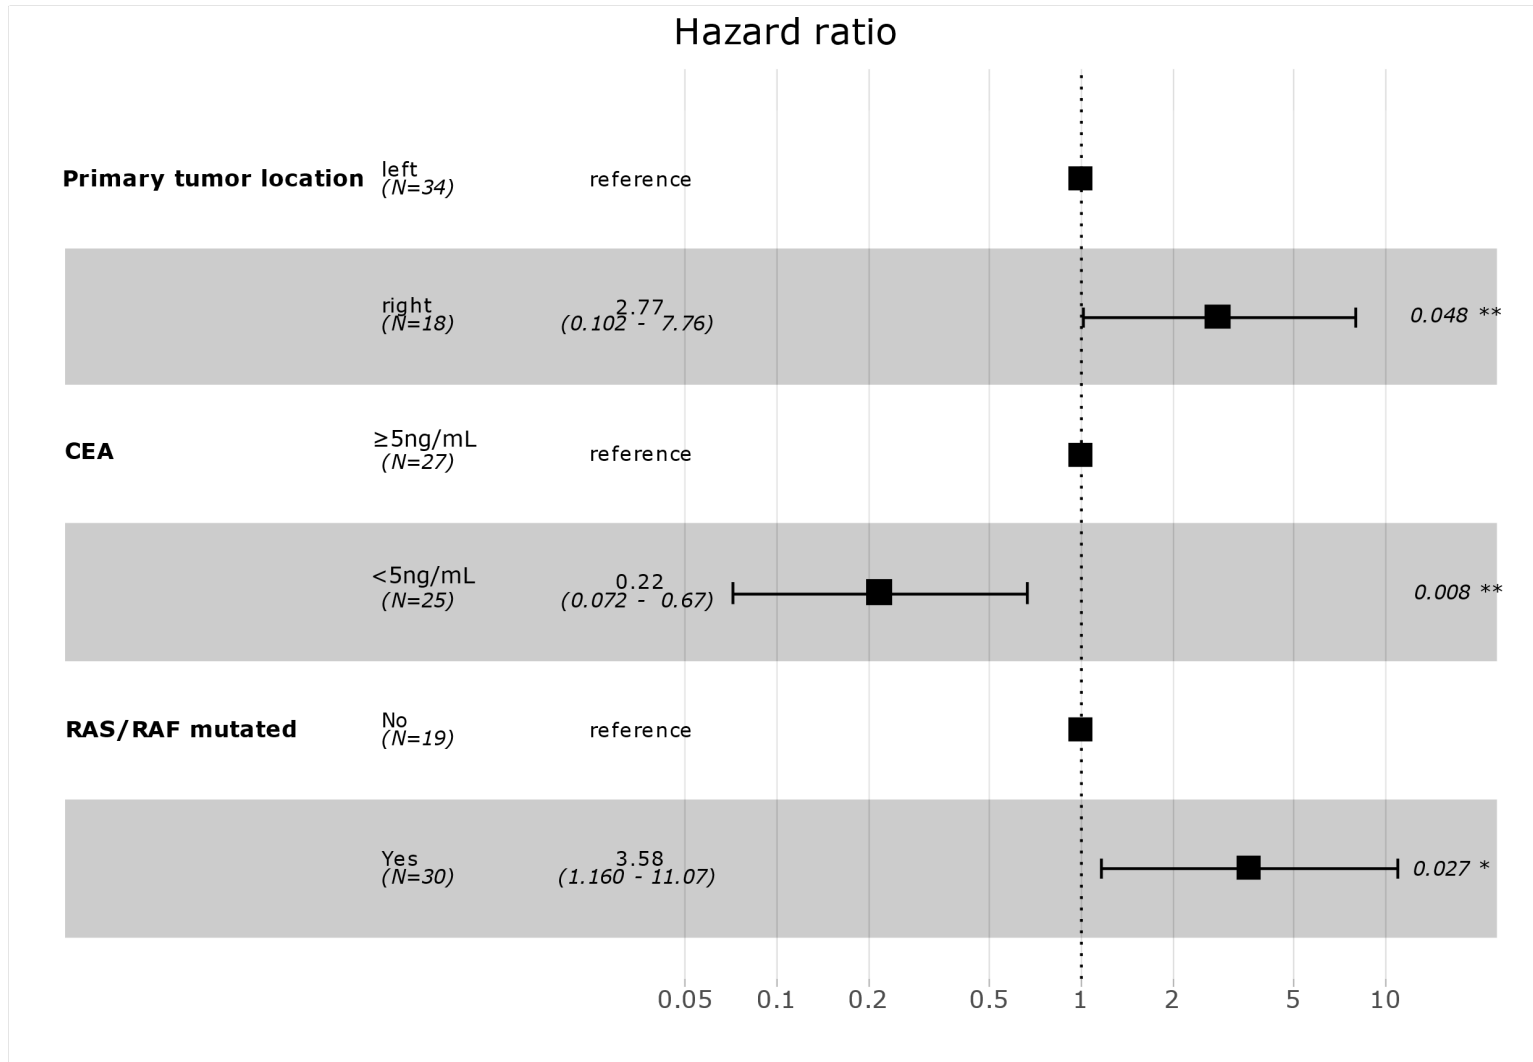

Supplement: jcav12p0460s1.pdf [file jcav12p0460s1.pdf]
